# Supplementary material for: Vegetable and Fruit Intake and Fracture-Related Hospitalisations: A Prospective Study of Older Women
Source: MDPI journal article supplement (doi:10.3390/nu9050511), 2017-05-18
Supplement: s1 [file s1]

**Table S1.** Descriptive statistics for intakes of cruciferous, allium, and total vegetables at baseline, 5 years (2003), and 7 years (2005).

|                        | Mean  | SD   |
|------------------------|-------|------|
| Cruciferous vegetables |       |      |
| Baseline               | 32.1  | 21.8 |
| 5 years (2003)         | 32.2  | 23.0 |
| 7 years (2005)         | 29.6  | 21.3 |
| Allium vegetables      |       |      |
| Baseline               | 8.1   | 6.9  |
| 5 years (2003)         | 6.6   | 5.5  |
| 7 years (2005)         | 5.9   | 5.4  |
| Total vegetables       |       |      |
| Baseline               | 200.7 | 77.4 |
| 5 years (2003)         | 178.4 | 74.3 |
| 7 years (2005)         | 169.2 | 68.7 |

Data presented as mean and SD,  $n = 986$ .

**Table S2.** Multivariable-adjusted hazard ratios for fracture-related hospitalisation for mean intakes of cruciferous, allium, and total vegetables across baseline, 5 years, and 7 years.

|                        | All Participant ( $n = 986$ ) | $p$ -Value |
|------------------------|-------------------------------|------------|
| Cruciferous vegetables | 0.89 (0.77, 1.02)             | 0.095      |
| Allium vegetables      | 0.83 (0.63, 1.10)             | 0.193      |
| Total vegetables       | 0.84 (0.71, 0.99)             | 0.044      |

Multivariable-adjusted hazard ratios (95% CI) for fracture-related hospitalisation analysed using Cox proportional hazard models, adjusted for age, body mass index (BMI), treatment code, prevalent diabetes mellitus, socioeconomic status, physical activity, smoking history, and energy, protein, calcium, and alcohol intake. Results are presented per 20 g/day for cruciferous vegetables, per 10 g/day for allium vegetables, and per 75 g/day for total vegetables.
